# Supplementary material for: ZnO Synthesized Using Bipolar Electrochemistry: Structure and Activity
Source: MDPI journal article supplement (doi:10.3390/ma12030535), 2019-02-11
Supplement: s1 [file s1]

Article

# ZnO Synthesized Using Bipolar Electrochemistry: Structure and Activity

Arya Hakimian, Steven McWilliams and Anna Ignaszak \*

Department of Chemistry, University of New Brunswick, 30 Dineen Drive, Fredericton, NB, E3B 5A3, Canada.

\* Correspondence: Anna.Ignaszak@unb.ca; Tel: +86-150-6261-9128

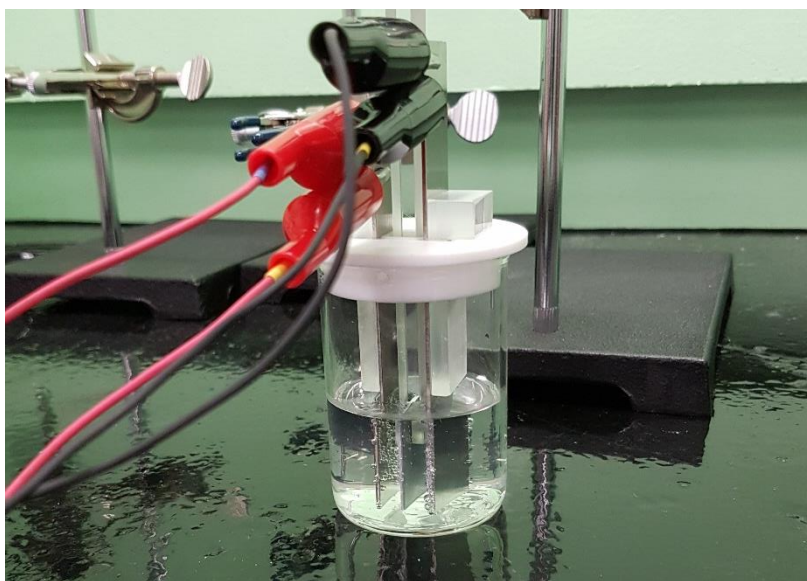

**Figure S1.** Reaction cell setup used for bipolar electrochemical synthesis.

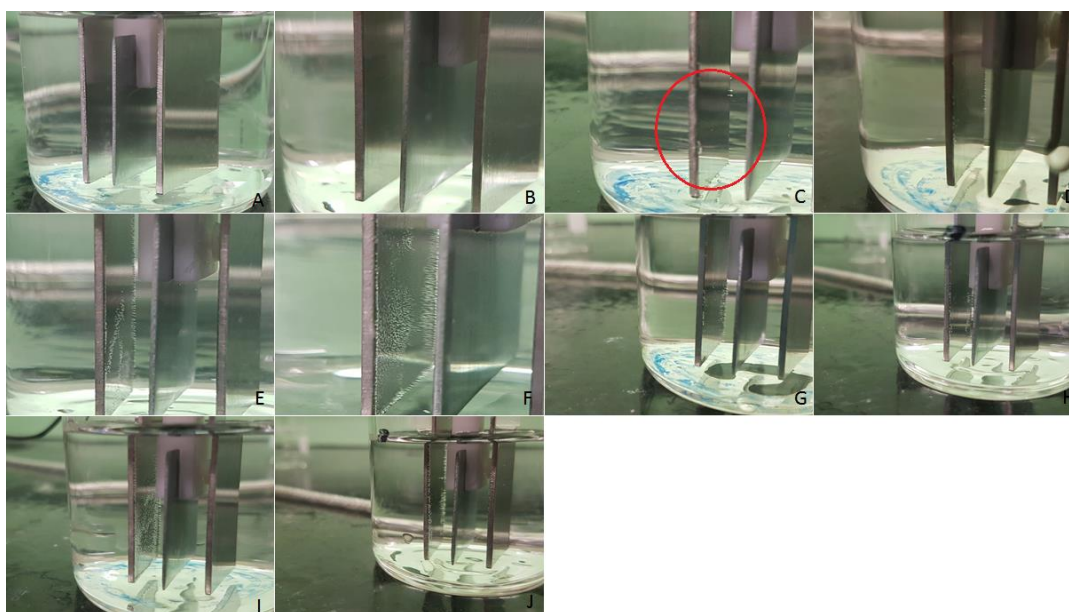

**Figure S2.** Images of the qualitative varying potential analysis performed at (A) 1.32 V, (B) 5 V, (C) 10 V, (D) 20 V, (E) 30 V, (F) 40 V, (G) 50 V, (H) 55 V, (I) 60 V and (J) 62.5 V.

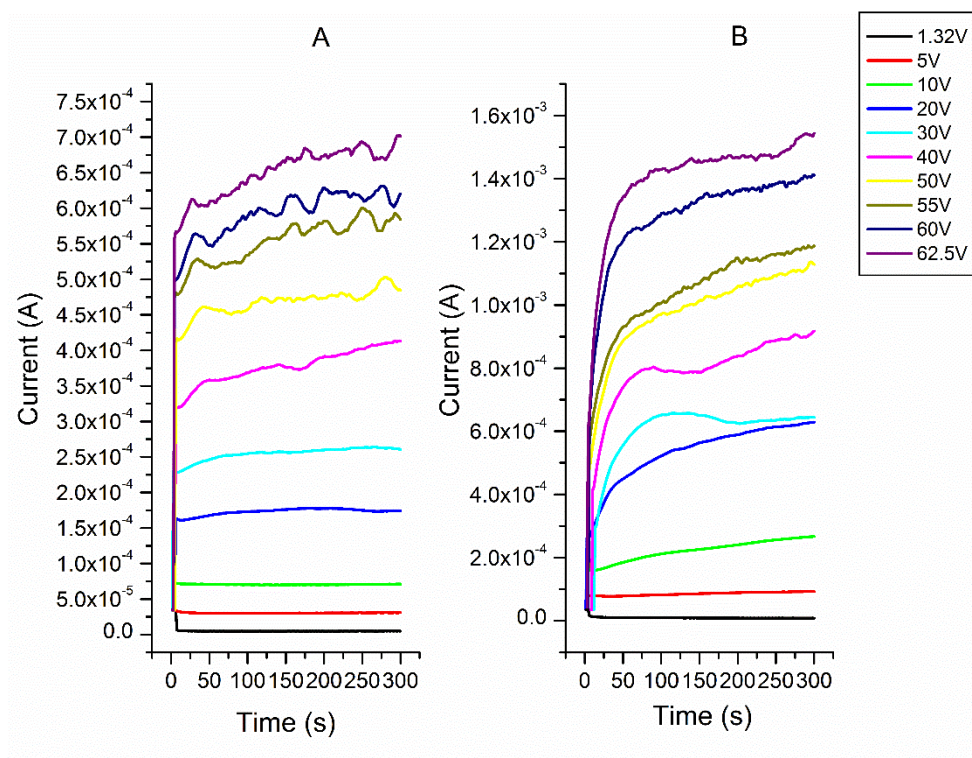

**Figure S3.**  $I$ - $t$  graphs of current generation at varying applied potentials for both systems (A) without and (B) with a bipolar electrode (BPE) present.

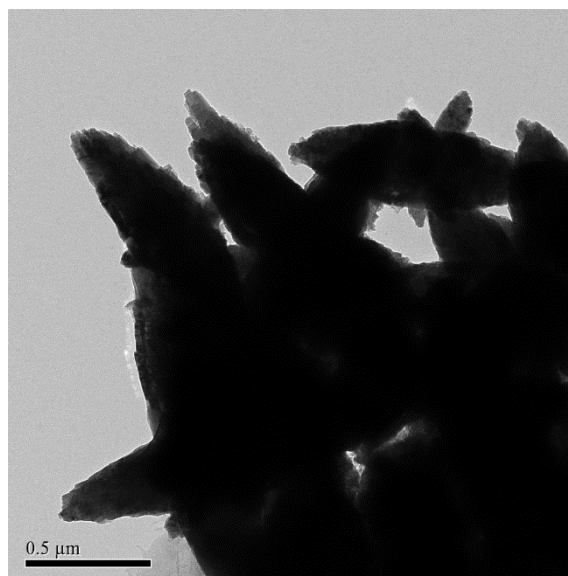

**Figure S4.** TEM image of a 2-h room temperature trial collected via evaporation showing the presence of larger agglomerates without any indication of smaller nanoparticles.



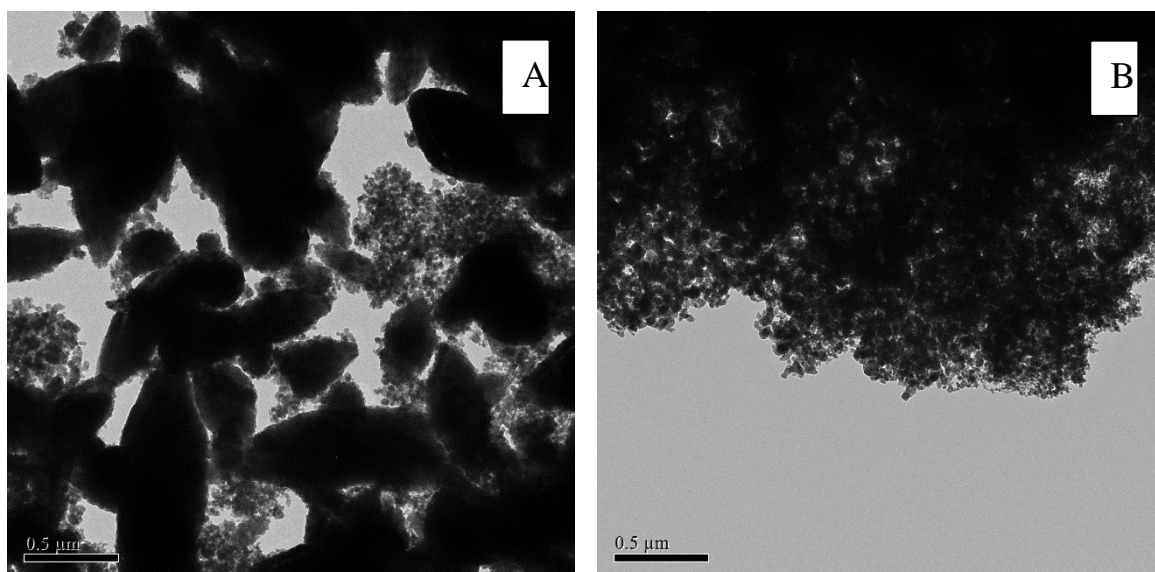

**Figure S5.** TEM images of 2-h trials collected via filtration performed at (A) room temperature and (B) in an ice bath ( $\sim 5^{\circ}\text{C}$ ).

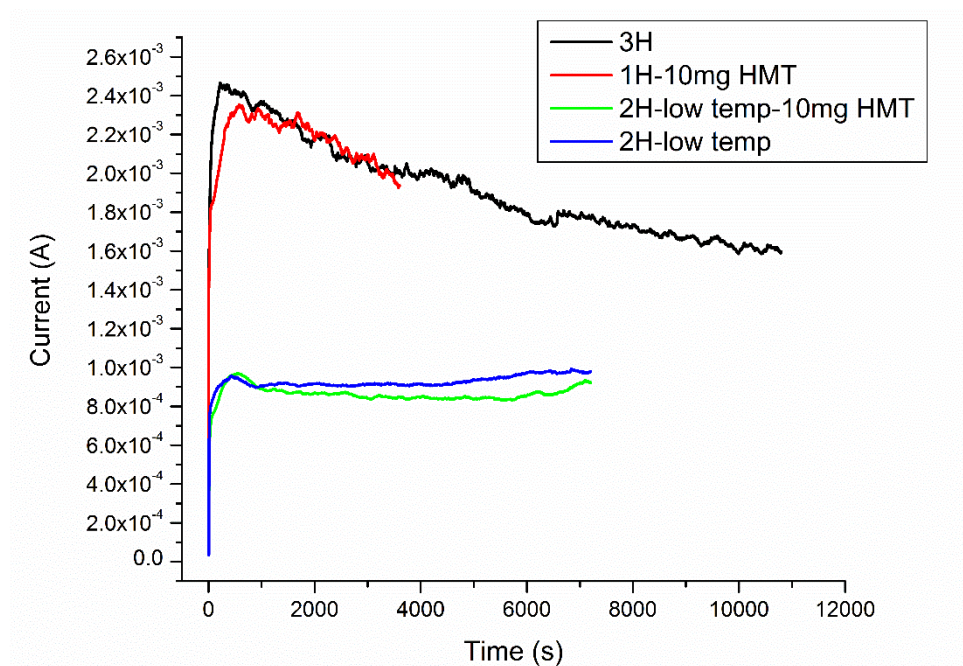

**Figure S6.** Overlay of the  $i-t$  graphs generated from trial data, which demonstrates the magnitude of current generated under various conditions.

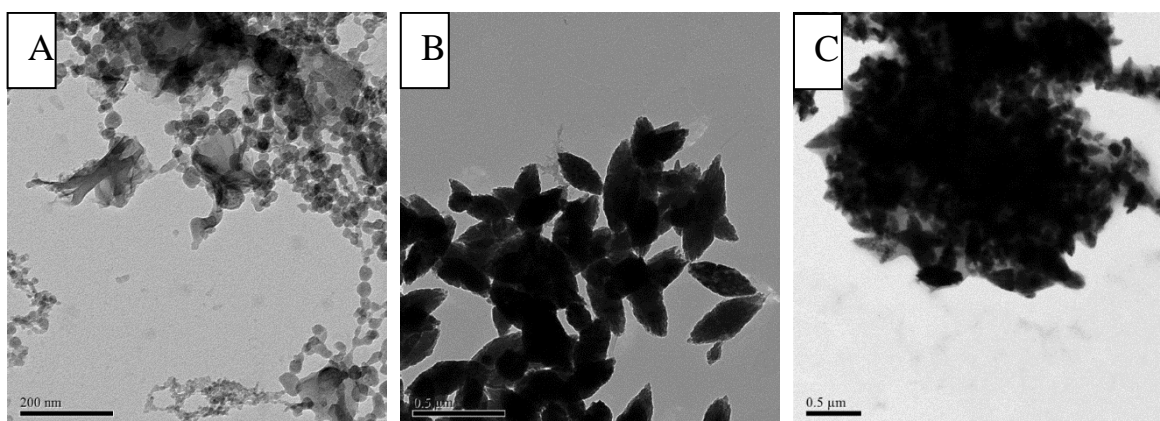

**Figure S7.** TEM images of 2-h room temperature trial with 10 mg hexamethylenetetramine (HMT) collected via evaporation resulting in both larger agglomerates and smaller nanoparticles (A,B) and 2-h room temperature trial with 10 mg PVP resulting solely in larger agglomerates (C).

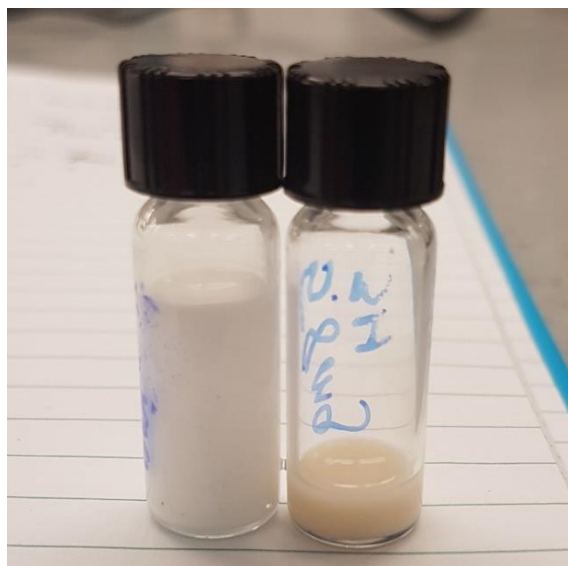

**Figure S8.** Comparison of pure white commercial ZnO (left) and 2-h synthesized sample (right) in ethanol depicting the off-white color obtained for the synthesized samples.

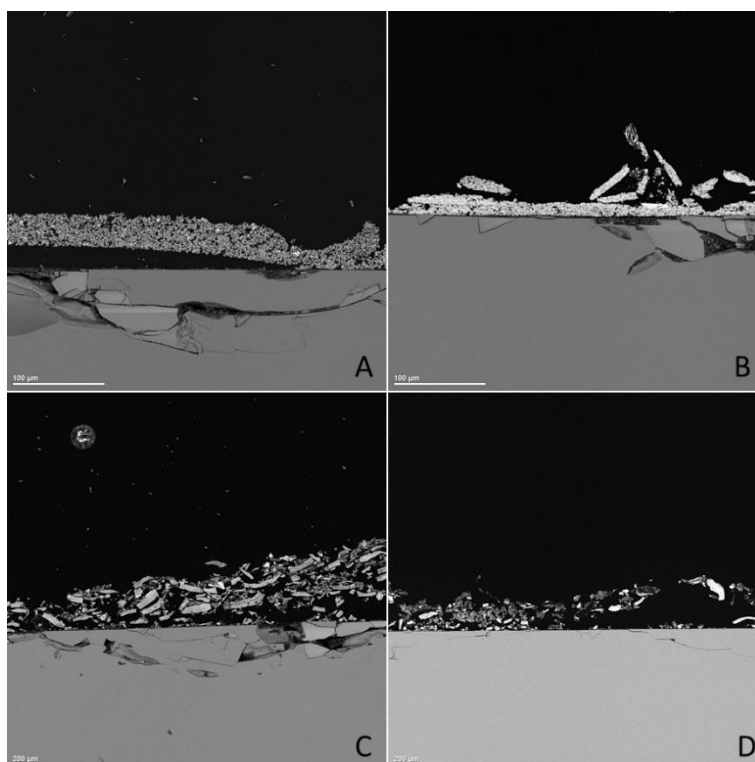

**Figure S9.** SEM cross-sectional images of Fluorine doped tin oxide (FTO)-coated ZnO electrodes for (A) Com, (B) 3He, (C) 3Hf and (D) 2H samples.

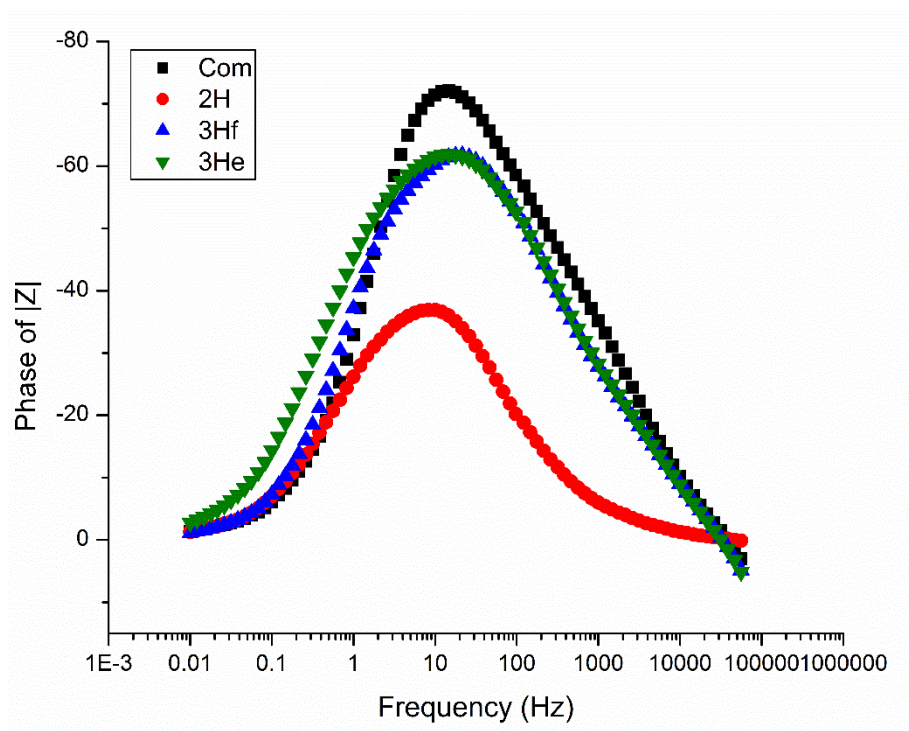

**Figure S10.** Bode diagram of the illuminated ZnO-based electrodes with the commercial and synthesized samples.

**Table S1.** Comparison of charger-transfer resistance ( $R_{ct}$ ), transport resistance ( $R_{tr}$ ), an effective diffusion length ( $L_n$ ) and free-electron lifetimes ( $t_n$ ) under illumination estimated by impedance modelling and from Equations (13) and (14) in main manuscript.

| ZnO | Dark                   |                                             |                                 |                                      |                                                 |                 |
|-----|------------------------|---------------------------------------------|---------------------------------|--------------------------------------|-------------------------------------------------|-----------------|
|     | L<br>( $\mu\text{m}$ ) | R <sub>ct</sub><br>( $\Omega \times 10^6$ ) | R <sub>tr</sub><br>( $\Omega$ ) | $\sqrt{\text{R}_{ct}/\text{R}_{tr}}$ | L <sub>n</sub><br>( $\mu\text{m} \times 10^3$ ) |                 |
| Com | 65.5                   | 94                                          | 245.0                           | 619.6                                | 40.5                                            |                 |
| 2H  | 84.3                   | 1.6                                         | 112.2                           | 119.4                                | 10.1                                            |                 |
| 3He | 54.4                   | 1.2                                         | 82.5                            | 119.0                                | 6.5                                             |                 |
| 3Hf | 80.2                   | 4.5                                         | 130.8                           | 185.6                                | 14.9                                            |                 |
| ZnO | Illuminated            |                                             |                                 |                                      |                                                 |                 |
|     | L<br>( $\mu\text{m}$ ) | R <sub>ct</sub><br>( $\Omega$ )             | R <sub>tr</sub><br>( $\Omega$ ) | $\sqrt{\text{R}_{ct}/\text{R}_{tr}}$ | L <sub>n</sub><br>( $\mu\text{m} \times 10^2$ ) | $\tau_n$<br>(s) |
| Com | 65.5                   | 4558.5                                      | 245.0                           | 4.2                                  | 2.7                                             | 0.27            |
| 2H  | 84.3                   | 994.6                                       | 112.2                           | 2.9                                  | 2.4                                             | 0.21            |
| 3He | 54.4                   | 4104.4                                      | 82.5                            | 7.0                                  | 3.8                                             | 0.25            |
| 3Hf | 80.2                   | 1947.7                                      | 130.8                           | 3.8                                  | 3.0                                             | 0.35            |
